# Supplementary material for: Acupuncture treatment of vascular cognitive impairment through peripheral nerve stimulation pathway: a scoping review
Source: Front Aging Neurosci. 2025 Apr 28;17:1515327. doi: 10.3389/fnagi.2025.1515327 (PMC12066784; doi:10.3389/fnagi.2025.1515327)
Supplement: Supplementary file 1 [file Data_Sheet_1.xlsx]

## Sheet: RCT
article	title	years	Study type	The acupoints involved	Main results and findings
Zhang et al. (2013)	Clinical observation on the effect of scalp electroacupuncture for mild cognitive impairment	2013	Clinical study (RCT)	Baihui (DU20), Sishencong (EX-HN1), Fengchi (GB20), Shenting (DU24)	Cognitive improvement: Scalp electroacupuncture significantly improved MMSE, clock-drawing test, and picture recognition scores in patients with MCI. It was as effective as syndrome differentiation acupuncture and better than nimodipine, with no adverse events reported.
Wang et al. (2016)	Efficacy and safety assessment of acupuncture and nimodipine to treat mild cognitive impairment after cerebral infarction: a randomized controlled trial	2016	Randomized controlled trial (RCT)	Unspecified	Cognitive improvement: Combination of acupuncture and nimodipine significantly improved MoCA scores in post-cerebral infarction MCI patients. The improvement was higher than acupuncture or nimodipine alone. Evaluation indicators: MoCA scores before and after 3 months of treatment, patient outcomes.
Wang et al. (2016)	Auricular acupuncture and body acupuncture for vascular cognitive impairment without dementia: a randomized controlled trial	2016	Randomized controlled trial (RCT)	Auricular points: Cortex, Heart, Kidney, Liver, Ear center. Body points: Temporal, Intelligence, Four Shen points.	Cognitive improvement: Both auricular acupuncture and body acupuncture improved MoCA and FAQ scores. The combination of auricular and body acupuncture was more effective in improving cognitive and social functions. Evaluation indicators: MoCA and FAQ scores before and after 4 weeks of treatment.
Liu et al. (2016)	Neuroprotection against vascular dementia after acupuncture combined with donepezil hydrochloride: P300 event related potential	2016	Clinical study (randomized controlled trial)	DU24, BL10, Extra (Sishencong, Yintang), DU26, PC6, HT7, GB20, GB12, DU20	Cognitive improvement: Acupuncture combined with donepezil significantly shortened P300 latency and increased amplitude in vascular dementia patients. Acupuncture also improved MMSE scores compared to donepezil alone. Evaluation indicators: P300 latency, amplitude, and MMSE scores.
Yang 2019	Effectiveness of acupuncture for vascular cognitive impairment no dementia: a randomized controlled trial	2019	Randomized controlled trial	ST36 (Zusanli), SP10 (Xuehai), RN17 (Danzhong), RN12 (Zhongwan), RN6 (Qihai), DU20 (Baihui), DU16 (Fengfu), BL15 (Xinshu), BL45 (Yixi), HT5 (Tongli), KI6 (Zhaohai), KI3 (Taixi), GB39 (Xuanzhong), ST40 (Fenglong), PC6 (Neiguan), BL17 (Geshu)	Acupuncture significantly improved cognitive function in VCIND patients compared to citicoline, showing a greater decrease in ADAS-cog score at three months (−2.33 vs −1.38) and six months (−2.61 vs −1.25). However, no significant differences were found for CDT and ADL scores. Acupuncture was found to be safe with few adverse events (bruising and needle-related pain).
Park 2020	A randomized controlled trial to evaluate the effectiveness and safety of electroacupuncture and transcranial direct current stimulation with computerized cognitive rehabilitation in patients with vascular cognitive impairment	2020	Randomized controlled trial	GV20 (Baekhoe), GB20 (Pungji), GV24 (Sinjeong), EX-HN1 (Sishencong)	Electroacupuncture combined with computerized cognitive rehabilitation was found to improve cognitive functions significantly in VCI patients. The Lowenstein occupational therapy cognitive assessment (LOTCA) showed improvement compared to control groups. Acupuncture at specific acupoints combined with tDCS resulted in notable therapeutic effects on executive and cognitive functioning.
Huang 2021	Effects of Acupuncture on Vascular Cognitive Impairment with No Dementia: A Randomized Controlled Trial	2021	Randomized controlled trial	GV20 (Baihui), GV24 (Shenting), GV17 (Naohu), GV26 (Shuigou), GV29 (Yintang), HT7 (Shenmen), SP6 (Sanyinjiao), GB20 (Fengchi), EX-HN1 (Sishencong)	Electroacupuncture (EA) significantly improved MoCA and MMSE scores in patients with vascular cognitive impairment with no dementia (VCIND) compared to sham acupuncture. The benefits were noted to diminish over time, with no serious adverse events reported, indicating EA is a safe short-term intervention for VCIND​(huang2021).
Sun 2022	Effect of Electroacupuncture Stimulation at Acupoints of the Heart Meridian on Cognitive Function in Vascular Dementia Patients	2022	Randomized controlled trial	LU11 (ShaoShang), LI1 (ShangYang), HT9 (ShaoChong), SJ1 (GuanChong), SI1 (ShaoZe)	Electroacupuncture significantly improved MMSE, ADL, and FAQ scores in patients with vascular dementia, showing an effective rate of 75%. No statistically significant difference compared to the oral medicine control group (P>0.05)​.
Yang 2022	Clinical observation of acupuncture at acupoints based on "four seas theory" for post-stroke cognitive impairment	2022	Randomized controlled trial	"Four seas theory" acupoints (specific points not listed)	Acupuncture improved MMSE and MoCA scores significantly more than control, demonstrating effectiveness in improving PSCI. The reduction in SDSVD score and changes in P300 wave amplitude also indicated positive outcomes for cognitive function and brain activity​.
Wang 2024	Cognitive and Hippocampal Changes in Older Adults With Subjective Cognitive Decline After Acupuncture Intervention	2024	Randomized controlled trial	Not specified	Acupuncture improved cognitive function, increased hippocampal volume, and enhanced functional connectivity in individuals with SCD. Significant changes were found in hippocampal structure, suggesting that acupuncture may be beneficial in the early stages of cognitive decline​.
Lin 2024	Electroacupuncture improves vascular cognitive impairment no dementia: A Randomized Clinical Trial	2024	Randomized controlled trial	Not specified	EA significantly improved cognitive function in VCIND patients, as indicated by increased MoCA scores, enhanced functional connectivity in the DMN, and increased gray matter volume. These findings suggest that EA can effectively improve cognitive and neural function in VCIND patients​.
Li et al. (2013)	Impacts of acupuncture at Jing-well points on the differentiated meridians and temple-three-needle therapy on P300 of patients with early vascular cognitive impairment	2013	Randomized controlled trial	Jing-well points, temple-three-needle	Cognitive improvement: Acupuncture at Jing-well points improved cognitive function by reducing P300 latency and increasing its amplitude. Significant improvements were also noted in MMSE scores, indicating enhanced cognitive function compared to conventional treatment.

## Sheet: no-RCT
article	title	years	Study type	The acupoints involved	Main results and findings
Zhi 2021	Acupuncture Can Regulate the Distribution of Lymphocyte Subsets and the Levels of Inflammatory Cytokines in Patients With Mild to Moderate Vascular Dementia	2021	Clinical Trial	"Sanjiao" acupuncture method (specific acupoints not detailed)	Acupuncture significantly increased the levels of CD3+ T cells, CD4+ T cells, and Tregs, while reducing TNF-α levels, indicating improved peripheral immune function in patients with vascular dementia (VD). It suggests that acupuncture can improve peripheral immune dysfunction through lymphocyte modulation and reduction of inflammation​.
Huang 2022	Acupuncture Treatment is Associated with Reduced Dementia Risk in Patients with Migraine: A Propensity-Score–Matched Cohort Study of Real-World Data	2022	Propensity-score matched cohort study	CV17 (Tanzhong), CV12 (Zhongwan), CV6 (Qihai), bilateral SP10 (Xuehai), ST36 (Zusanli)	Acupuncture treatment in patients with migraine was associated with a reduced risk of dementia (adjusted hazard ratio [aHR] = 0.51, 95% CI = 0.40–0.65). Acupuncture decreased the cumulative incidence of dementia, providing preventive benefits against cognitive decline in migraine patients​.

## Sheet: Experimental animal study
article	title	years	Study type	The acupoints involved	Main results and findings
Yu et al. (2005)	Acupuncture improved cognitive impairment caused by multi-infarct dementia in rats	2005	Experimental animal study (rat model of multi-infarct dementia)	Tanzhong (CV17), Zhongwan (CV12), Qihai (CV6), Zusanli (ST36), Xuehai (SP10)	Cognitive improvement: Acupuncture treatment significantly shortened the escape latency in the Morris water maze, indicating an improvement in spatial memory. Acupuncture demonstrated specificity in treating cognitive impairment caused by multi-infarct dementia, leading to improved learning strategies and memory retrieval.
Liu et al. (2006)	Acupuncture prevents cognitive deficits and oxidative stress in cerebral multi-infarction rats	2006	Experimental animal study (rat model of multi-infarction dementia)	Tanzhong (CV17), Zhongwan (CV12), Qihai (CV6), Zusanli (ST36), Xuehai (SP10)	Cognitive improvement: Acupuncture treatment significantly shortened the escape latency in the Morris water maze, indicating an improvement in spatial memory. Oxidative stress: Acupuncture increased the activity of antioxidant enzymes, specifically superoxide dismutase (SOD) and glutathione peroxidase (GSH-Px), in the hippocampus, which reduced oxidative damage caused by cerebral infarction. Mole…
Wang et al. (2009)	Acupuncture protected cerebral multi-infarction rats from memory impairment by regulating the expression of apoptosis-related genes Bcl-2 and Bax in hippocampus	2009	Experimental animal study (rat model of multi-infarction dementia)	Tanzhong (CV17), Zhongwan (CV12), Qihai (CV6), Zusanli (ST36), Xuehai (SP10)	Cognitive improvement: Acupuncture significantly shortened the escape latency and increased the time spent in the target quadrant in the Morris water maze, indicating memory improvement. Apoptosis regulation: Acupuncture modulated apoptosis-related gene expression, increasing Bcl-2 (anti-apoptotic) and decreasing Bax (pro-apoptotic) in the hippocampal CA1 region, reducing the number of apoptotic …
Zhao et al. (2011)	Effects of acupuncture on glycometabolic enzymes in multi-infarct dementia rats	2011	Experimental animal study (rat model of multi-infarction dementia)	Tanzhong (CV17), Zhongwan (CV12), Qihai (CV6), Zusanli (ST36), Xuehai (SP10)	Cognitive improvement: Acupuncture improved cognitive function in the Morris water maze by significantly reducing escape latency. Glycometabolic regulation: Acupuncture increased the activities of glycometabolic enzymes, including hexokinase, pyruvate kinase, and glucose 6 phosphate dehydrogenase, in both the hippocampus and cortex, which may contribute to improving energy metabolism and mitigati…
Wei et al. (2011)	Effects of electroacupuncture versus nimodipine on long-term potentiation and synaptophysin expression in a rat model of vascular dementia	2011	Experimental animal study (rat model of vascular dementia)	Baihui (DU20), Dazhui (DU14)	Cognitive improvement: Electroacupuncture significantly shortened the escape latency in the Morris water maze test and increased the frequency of crossing the platform quadrant, demonstrating enhanced learning and memory. The effects were similar to nimodipine. Synaptic plasticity: Electroacupuncture enhanced hippocampal synaptic plasticity by shortening the PS latency and increasing EPSP slope a…
Wang et al. (2015)	Acupuncture ameliorates cognitive impairment and hippocampus neuronal loss in experimental vascular dementia through Nrf2-mediated antioxidant response	2015	Experimental animal study (rat model of vascular dementia)	Baihui (DU20), Zusanli (ST36)	Cognitive improvement: Acupuncture significantly shortened escape latency in the Morris water maze. Neuroprotection: Acupuncture enhanced hippocampal neuroprotection by activating the Nrf2 antioxidant pathway and reducing microglia activation. Molecular targets: Acupuncture upregulated Nrf2 and its target genes HO-1 and NQO1 in hippocampal neurons. Evaluation indicators: Time latency, hippocampal…
Cai et al. (2015)	Effects of electroacupuncture on learning-memory ability and expression of hippocampal VEGF, VEGFR-1 and VEGFR-2 genes in vascular cognitive impairment rats	2015	Experimental animal study (rat model of vascular cognitive impairment)	Dazhui (GV14), Baihui (GV20), Shuigou (GV26), Shenting (GV24)	Cognitive improvement: Electroacupuncture significantly improved learning and memory abilities in vascular cognitive impairment rats. Molecular targets: Electroacupuncture upregulated the expression of VEGF, VEGFR-1, and VEGFR-2 mRNA in the hippocampus. Evaluation indicators: Escape latency, error count, VEGF mRNA expression, and hippocampal neovascularization were key measures.
Li et al. (2015)	Acupuncture attenuates cognitive deficits and increases pyramidal neuron number in hippocampal CA1 area of vascular dementia rats	2015	Experimental animal study (rat model of vascular dementia)	Zusanli (ST36)	Cognitive improvement: Acupuncture significantly decreased escape latency in the Morris water maze. Neuroprotection: Acupuncture increased pyramidal neuron numbers in the hippocampal CA1 area and tended to decrease astrocyte counts. Evaluation indicators: Escape latency, pyramidal neuron number, astrocyte count, and synaptic bouton number in hippocampal CA1 area were key measures.
Yang et al. (2016)	Neuroprotective Effects of Electroacupuncture on an Animal Model of Bilateral Common Carotid Artery Occlusion	2016	Experimental animal study (gerbil model of vascular cognitive impairment)	KI3 (Taegye), GV20 (Baihui)	Cognitive improvement: Electroacupuncture improved cognitive function in BCCAO-induced MCI. Molecular targets: Reduced expression of neuroinflammatory markers (Iba-1, TLR4, pERK, TNF-α) in the hippocampus. Glucose metabolism: EA increased glucose metabolism by 1.4-fold in the hippocampus. Evaluation indicators: Cognitive function, neuroinflammatory proteins, and glucose metabolism in the hippocam…
Li et al. (2016)	Acupuncture reversed hippocampal mitochondrial dysfunction in vascular dementia rats	2016	Experimental animal study (rat model of vascular dementia)	GV20 (Baihui), ST36 (Zusanli)	Cognitive improvement: Acupuncture improved spatial learning and memory in Morris water maze. Mitochondrial function: Acupuncture reversed hippocampal mitochondrial dysfunction by increasing complex I, II, IV activities and reducing ROS production. Evaluation indicators: Spatial learning, memory, mitochondrial respiratory enzyme activity, ROS levels.
Ye 2017	Acupuncture Attenuated Vascular Dementia–Induced Hippocampal Long-Term Potentiation Impairments via Activation of D1/D5 Receptors	2017	Experimental study	Zusanli (ST36), Baihui (GV20)	Acupuncture significantly reversed cognitive deficits and LTP impairments induced by the 2-vessel occlusion (2VO) model in rats. The therapeutic effects were achieved via the activation of D1/D5 dopamine receptors, as confirmed by antagonist experiments that blocked cognitive improvements and LTP enhancement. Acupuncture increased the levels of dopamine and its metabolites (DOPAC, HVA, epinephrin…
Zhu 2018	Anti-oxidative and anti-apoptotic effects of acupuncture: Role of Thioredoxin-1 in the hippocampus of vascular dementia rats	2018	Experimental study	GV20 (Baihui), ST36 (Zusanli)	Acupuncture significantly improved cognitive deficits in VD rats by up-regulating Thioredoxin-1 (Trx-1) and Thioredoxin reductase-1 (TrxR-1), reducing oxidative stress and neuronal apoptosis in the hippocampus. It also inhibited the ASK1-JNK/p38 signaling pathway. The effects were blocked by Trx-1 siRNA, indicating a key role of Trx-1/TrxR-1 in the mechanism.
Yang 2018	Acupuncture as a multifunctional neuroprotective therapy ameliorates cognitive impairment in a rat model of vascular dementia: A quantitative iTRAQ proteomics study	2018	Experimental study	ST36 (Zusanli), GV20 (Baihui)	Acupuncture significantly improved cognitive function in VD rats, reduced ROS production, and increased neuronal survival and synaptic plasticity. A total of 31 proteins were differentially expressed, mostly related to oxidative stress, apoptosis, and synaptic function, as validated by Western blot.
Xiao 2018	Acupuncture Prevents the Impairment of Hippocampal LTP Through β1-AR in Vascular Dementia Rats	2018	Experimental study	ST36 (Zusanli), GV20 (Baihui)	Acupuncture improved hippocampal long-term potentiation (LTP) in VD rats by increasing norepinephrine levels and activating β1-adrenergic receptors (β1-AR). Inhibition of β1-AR blocked the enhancement effect of acupuncture on LTP, suggesting that β1-AR plays a key role in mediating the neuroprotective effects.
Wu 2018	Effects of electroacupuncture of different frequencies on free radicals in hippocampus of mice with vascular dementia	2018	Experimental study	Baihui (GV 20), Dazhui (GV 14), Geshu (BL 17), Zusanli (ST 36)	Electroacupuncture improved cognitive impairment in VD mice by increasing CGRP, reducing MDA levels, and regulating NOS, TChE, and SOD activities in the hippocampus. The 2 Hz/80 Hz group showed superior effects compared to other frequency groups.
Lin 2018	The Effect of Electroacupuncture versus Manual Acupuncture through the Expression of TrkB/NF-κB in the Subgranular Zone of the Dentate Gyrus of Telomerase-Deficient Mice	2018	Experimental study	ST36 (Zusanli)	Electroacupuncture (EA) was more effective than manual acupuncture (MA) in improving spatial learning and memory in telomerase-deficient mice. EA specifically increased the expression of TrkB and NF-κB, while ERK/p-ERK levels were not significantly affected.
He 2018	Neurochemical changes in the hippocampus and prefrontal cortex associated with electroacupuncture for learning and memory impairment	2018	Experimental study	GV20 (Baihui), DU24	Electroacupuncture improved cognitive function, reduced cerebral infarct volume, and increased NAA/Cr and Cho/Cr ratios in the hippocampus and prefrontal cortex of VD rats. The Glu/Cr ratio did not significantly change, suggesting improved neurochemical metabolism.
Du 2018	Acupuncture inhibits TXNIP-associated oxidative stress and inflammation to attenuate cognitive impairment in vascular dementia rats	2018	Experimental study	ST36 (Zusanli), GV20 (Baihui)	Acupuncture reduced oxidative stress and inflammation in VD rats by inhibiting TXNIP, NLRP3, and IL-1β expression. The neuroprotective effects involved reducing ROS production and preventing neuronal loss, mimicking the effects of TXNIP siRNA.
Yang 2020	Standardizing therapeutic parameters of acupuncture in vascular dementia rats	2020	Experimental study	ST36 (Zusanli), GV20 (Baihui)	Acupuncture significantly improved spatial learning and memory in VD rats by reversing hippocampal neuronal damage. The optimal therapeutic parameters involved needle retention for 10 minutes, 30-second rotation every 5 minutes, and daily treatment. Morris Water Maze results indicated significant improvements compared to non-treatment groups.
Wang 2020	Acupuncture attenuates inflammation in microglia of vascular dementia rats by inhibiting miR-93-mediated TLR4/MyD88/NF-κB signaling pathway	2020	Experimental study	GV20 (Baihui), ST36 (Zusanli)	Acupuncture significantly reduced inflammatory cytokine levels (IL-6, TNF-α) in VD rats. It downregulated TLR4, MyD88, and NF-κB signaling pathways, inhibiting neuroinflammation. These effects were comparable to TLR4 antagonist TAK-242. Acupuncture's anti-inflammatory effects in microglia improved cognitive function as assessed by the Morris Water Maze test.
Ma 2020	Acupuncture improves white matter perfusion and integrity in rat model of vascular dementia: An MRI-based imaging study	2020	Experimental study	GV20 (Baihui), ST36 (Zusanli)	Acupuncture improved cognitive function in VD rats by increasing cerebral blood flow (CBF) and protecting white matter integrity. MRI results indicated increased fractional anisotropy and reduced radial and axial diffusivity in white matter regions. Pathological analysis showed reduced microglial activation and inflammatory cytokine production (IL-1β, IL-6).
Pan 2021	Acupuncture Can Regulate the Peripheral Immune Cell Spectrum and Inflammatory Environment of the Vascular Dementia Rat, and Improve the Cognitive Dysfunction of the Rats	2021	Experimental study	CV17 (Tangzhong), CV12 (Zhongwan), CV6 (Qihai), ST36 (Zusanli), SP10 (Xuehai)	Acupuncture improved cognitive dysfunction in VD rats, reduced inflammatory markers (e.g., IL-1β, TNF-α, MIP-2), and increased anti-inflammatory markers (e.g., IL-4, IL-10). Acupuncture also increased CD4+ T lymphocytes in peripheral blood and spleen, suggesting it helps in immune regulation and inflammation reduction​.
Cao 2021	Acupuncture Attenuates Cognitive Deficits Through α7nAChR Mediated Anti-inflammatory Pathway in Chronic Cerebral Hypoperfusion Rats	2021	Experimental study	ST36 (Zusanli), GV20 (Baihui)	Acupuncture improved cognitive deficits in rats with chronic cerebral hypoperfusion (CCH) by modulating the α7nAChR pathway, which reduced inflammation and neuronal damage. Acupuncture inhibited the activation of microglia and upregulated the JAK2/STAT3 signaling pathways, providing anti-inflammatory and neuroprotective effects​(cao2021).
Dai 2022	Electroacupuncture Increases the Hippocampal Synaptic Transmission Efficiency and Long-Term Plasticity to Improve Vascular Cognitive Impairment	2022	Experimental study	GV20 (Baihui), GV24 (Shenting)	Electroacupuncture increased synaptic transmission efficiency and synaptic plasticity in the hippocampal CA3-CA1 circuit of VCI model rats. EA enhanced synaptic plasticity markers, including NMDAR2B, AMPAR1, and CaMKII, resulting in improved learning and memory functions in rats with VCI​.
Bu 2022	Electroacupuncture Attenuates Immune-Inflammatory Response in Hippocampus of Rats with Vascular Dementia by Inhibiting TLR4/MyD88 Signaling Pathway	2022	Experimental study	GV20 (Baihui), RN17 (Danzhong), BL17 (Geshu), RN6 (Qihai), SP6 (Sanyinjiao)	Electroacupuncture inhibited the TLR4/MyD88 signaling pathway, reduced IL-6 and TNF-α levels, and improved hippocampal neuronal structure in vascular dementia model rats. EA alleviated immune-inflammatory responses, suggesting its potential as an alternative therapy for vascular dementia​.
Yang 2022	Acupuncture attenuates cognitive impairments in vascular dementia through inhibiting miR-143-3p	2022	Experimental study	GV20 (Baihui), ST36 (Zusanli), CV17 (Tanzhong), CV12 (Zhongwan), CV6 (Qihai), SP10 (Xuehai), LR3 (Taichong), ST40 (Fenglong), GB20 (Fengchi), SP6 (Sanyinjiao)	Acupuncture treatment significantly reduced miR-143-3p expression in VD patients and rats, which correlated with improved cognitive function. This indicates a potential mechanism for acupuncture through modulation of miR-143-3p, impacting neuronal inflammation and apoptosis.
Ma 2022	Electroacupuncture of Baihui and Shenting acupoints for vascular dementia in rats through the miR-81/IL-16/PSD-95 pathway	2022	Experimental study	GV20 (Baihui), GV24 (Shenting)	Electroacupuncture at GV20 and GV24 improved cognitive function in VD rats by modulating the miR-81/IL-16/PSD-95 pathway, reducing neuronal apoptosis and enhancing synaptic plasticity. This suggests a novel mechanism through which EA benefits cognitive impairment in VD​.
Qiu 2023	Acupuncture regulates the Th17/Treg balance and improves cognitive deficits in a rat model of vascular dementia	2023	Experimental study	Not specified	Acupuncture treatment in vascular dementia (VD) rats improved cognitive deficits by regulating the balance of Th17/Treg cells, reducing inflammation, and promoting immune homeostasis. These effects were attributed to the modulation of key pathways involved in immune response, suggesting acupuncture's potential as a therapeutic option for VD.
Liu 2023	Electroacupuncture inhibits hippocampal neuronal apoptosis and improves cognitive dysfunction in mice with vascular dementia via the JNK signaling pathway	2023	Experimental study	GV20 (Baihui), BL17 (Geshu), BL23 (Shenshu)	Electroacupuncture (EA) inhibited hippocampal apoptosis in VD mice by downregulating the JNK signaling pathway. EA promoted Bcl-2 expression and inhibited AP-1, p53, and Bax, leading to improved cognitive function, indicating its neuroprotective role through anti-apoptotic mechanisms​.
Lin 2023	Cephalic electroacupuncture restores learning and memory in rats with induced ischemic stroke via inhibition of NF-κB nuclear translocation	2023	Experimental study	GV20 (Baihui), GV24 (Shenting)	EA improved cognitive function in ischemic stroke rats by inhibiting NF-κB-mediated inflammatory responses in the hippocampus. EA significantly reduced IL-1β, IL-6, and TNF-α levels, demonstrating its anti-inflammatory effect in the treatment of post-stroke cognitive deficits​.
Sa 2023	Effects of electroacupuncture on rats with cognitive impairment: An iTRAQ-based proteomics analysis	2023	Experimental study	GV20 (Baihui), GV24 (Shenting)	Electroacupuncture significantly reduced neurological deficit scores, shortened escape latency, and increased platform crossings in rats with cognitive impairment. Proteomic analysis revealed changes in oxidative phosphorylation, glycolipid metabolism, and synaptic transmission, suggesting molecular mechanisms involving Hspb1 upregulation, which may be linked to the cognitive improvement observed…
Wang 2024	Electroacupuncture enhances cerebral blood perfusion by inhibiting HIF-1α in rat subarachnoid hemorrhage	2024	Experimental study	Not specified	EA enhanced cerebral blood perfusion by downregulating HIF-1α, endothelin, and ICAM-1 expression, while increasing eNOS levels. These effects alleviated vasospasm and improved cognitive deficits in SAH rats, suggesting a role of EA in modulating the HIF-1α pathway.

## Sheet: Systematic review
article	title	years	Study type	The acupoints involved	Main results and findings
Peng et al. (2007)	Acupuncture for vascular dementia: A systematic review	2007	Systematic review of randomized controlled trials (RCTs) for vascular dementia	Various acupoints based on included studies, unspecified in review	Effectiveness uncertainty: This systematic review found insufficient evidence from high-quality randomized controlled trials to conclude the effectiveness of acupuncture for vascular dementia. Evaluation indicators: The review emphasized the need for randomized, placebo-controlled trials to assess cognitive function (e.g., MMSE), behavior, activities of daily living, and mood, but no conclusive e…
Zhou et al. (2013)	Treating vascular mild cognitive impairment by acupuncture: a systematic review of randomized controlled trials	2013	Systematic review of randomized controlled trials (RCTs)	Zhongwan (CV12), Quchi (LI11), Hegu (LI4), Xuehai (SP10), Shenshu (BL23), Taixi (KI3), Sanyinjiao (SP6), Yanglingquan (GB34)	Cognitive improvement: Acupuncture significantly improved cognitive function in VMCI patients. Biochemical markers like MCP-1, SOD, CD4/CD8 were modulated, and improvements were noted in glycometabolism and oxidative stress markers.
Leung et al. (2013)	Acupuncture improves cognitive function: a systematic review	2013	Systematic review of human and animal studies	Various acupoints, including GV20, LI4, PC6, ST36	Cognitive improvement: Acupuncture had a positive effect on cognitive function in animal studies, though human studies showed inconsistent results. Key neurobiological effects included increased SOD activity, reduced apoptosis, and improved neuroplasticity.
Cao et al. (2013)	Acupuncture for vascular mild cognitive impairment: a systematic review of randomized controlled trials	2013	Systematic review of randomized controlled trials (RCTs)	PC6, GV20, GB20, ST36, SP10	Cognitive improvement: Acupuncture significantly improved MMSE scores in VMCI patients when combined with conventional therapies. More rigorous trials are needed to confirm these findings due to concerns about study quality.
Ye 2017	Mechanisms of Acupuncture on Vascular Dementia: A Review of Animal Studies	2017	Review of animal studies	Dazhui (GV14), Baihui (GV20), Qihai (RN6), Zhongwan (RN12), Danzhong (RN17), Zusanli (ST36), Xuehai (SP10), Shenshu (BL23)	Acupuncture improves cognitive function in vascular dementia (VaD) by reducing oxidative stress, attenuating neuron apoptosis, relieving neuroinflammation, regulating glucose metabolism, modulating neurotransmitters, improving synaptic plasticity, and enhancing blood vessel function. Key molecular targets include ROS, NO, NF-κB, and NADPH oxidase. Acupuncture also up-regulates Bcl-2 and down-regu…
Kwon 2018	Efficacy and Safety of Auricular Acupuncture for Cognitive Impairment and Dementia: A Systematic Review	2018	Systematic review	Auricular points	Auricular acupuncture (AA) showed mixed efficacy for cognitive improvement in patients with dementia. AA combined with herbal medicine improved MMSE scores and ADL in vascular cognitive impairment without dementia (VCIND). No significant adverse events were reported, but the methodological quality was generally low.
Tan 2020	Acupuncture in neuroinflammation regulation may be related to inhibition of M1 microglial activation involved in dementia	2020	Review	GV20 (Baihui), GV26, GV29, ST36 (Zusanli)	Acupuncture improves cognition by inhibiting M1 microglial activation, particularly through TLRs/NF-κB and MAPK pathways, thereby reducing neuroinflammation. Evidence suggests beneficial effects on Alzheimer's disease (AD), vascular dementia (VD), and Parkinson's disease (PD) through modulation of neuroinflammatory response.
Huang 2021	Effects of Acupuncture on Oxidative Stress Amelioration via Nrf2/ARE‐Related Pathways in Alzheimer and Parkinson Diseases	2021	Review	LU11 (ShaoShang), LI11 (Quchi), HT7 (ShenMen), HT5 (TongLi), PC6 (NeiGuan), PC5 (JianShi), SJ5 (WaiGuan), LI1 (ShangYang), LI4 (Hegu), HT9 (ShaoChong), SJ1 (GuanChong), SI1 (ShaoZe), PC7 (DaLing), SP6 (ShanYinJiao), KID3 (TaiXi), KID4 (DaZhong), KID6 (ZhaoHai), ST36 (ZuSanLi), GB44 (ZuQiaoYin), UB67 (ZhiYin), GB30 (HuanTiao), DU1 (ChangQiang), SP10 (XueHai), UB23 (ShenShu), DU3 (YaoYangGuan), REN…	Acupuncture demonstrated antioxidative effects in Alzheimer’s and Parkinson’s disease models by activating the Nrf2/ARE pathway, which helps maintain cellular redox balance and reduce neuroinflammation. Key findings include acupuncture's role in modulating antioxidant enzymes like SOD and catalase through the activation of Nrf2, ultimately providing neuroprotective effects against oxidative stres…
Han 2022	Overview of systematic reviews of acupuncture for vascular cognitive impairment	2022	Overview of systematic reviews	Not specified	A comprehensive analysis of 22 systematic reviews on acupuncture for vascular cognitive impairment (VCI) concluded that acupuncture has low-quality evidence for improving VCI. Methodological and evidence quality was found to be poor, indicating a need for standardized and high-quality studies to confirm acupuncture's efficacy​.
Zhou 2022	Bibliometric review of 1992–2022 publications on acupuncture for cognitive impairment	2022	Systematic review	Not specified	The bibliometric analysis identified 279 publications, mainly from China, exploring acupuncture's effect on diseases like Alzheimer's disease, vascular dementia, and ischemic stroke. Research hotspots included fMRI, synaptic injury, glucose metabolism, and signaling pathways like NF-kB and MMP-2, indicating future trends in acupuncture research.
Zeng 2022	Outcomes in randomized controlled trials of acupuncture for vascular cognitive impairment during recent five years	2022	Systematic review	Not specified	Analysis of 21 RCTs on acupuncture for VCI identified nine categories of outcome indicators, including clinical symptoms, neuroimaging, and quality of life measures. Acupuncture's effects on VCI outcomes were highlighted, with suggestions for standardizing primary and secondary outcome measures to enhance study reliability​.
Qi 2022	Visualization and analysis of the mapping knowledge domain of acupuncture and central nervous system cell apoptosis	2022	Review	Not specified	Scientometric analysis showed increasing research on acupuncture's anti-apoptotic effects in the central nervous system, especially focusing on electroacupuncture, anti-neuronal apoptosis, and regulation of related signaling pathways like MAPK. Collaboration among research teams is crucial for advancing this field.
Nie 2022	Bibliometric analysis: Research trends of acupuncture treatment for cognitive impairment in recent 15 years	2022	Systematic review	Not specified	Bibliometric analysis identified China and the USA as leading countries in acupuncture research for cognitive impairment. The study suggests an increasing trend in publications, with research hotspots focusing on acupuncture's mechanism in cognitive function improvement.
Li 2023	The effects and mechanisms of acupuncture for post-stroke cognitive impairment: progress and prospects	2023	Review	CV17 (Tanzhong), CV12 (Zhongwan), CV6 (Qihai), ST36 (Zusanli), SP10 (Xuehai), GV20 (Baihui), GV24 (Shenting)	Acupuncture improved PSCI by inhibiting neuronal apoptosis, promoting synaptic plasticity, and reducing inflammation. It also enhanced brain energy metabolism, including improved cerebral blood flow and mitochondrial function, providing evidence for its application in PSCI treatment​(li2023).
Zhang 2023	The neuroprotective and neural circuit mechanisms of acupoint stimulation for cognitive impairment	2023	Review	GV20 (Baihui), EX-HN1 (Sishencong), GB20 (Fengchi), GV26 (Shuigou), GV24 (Shenting), PC6 (Neiguan), ST36 (Zusanli), SP6 (Sanyinjiao), HT7 (Shenmen), KI3 (Taixi), BL23 (Shenshu), ST40 (Fenglong), LR3 (Taichong), GV14 (Dazhui), GB39 (Xuanzhong)	Acupoint stimulation was found to improve spatial learning and memory by protecting hippocampal neurons, reducing apoptosis, and scavenging toxic proteins. It has antioxidant and anti-inflammatory effects, promotes neural regeneration, regulates synaptic plasticity, and inhibits the production of amyloid β-peptide and Tau protein phosphorylation, potentially protecting neurons through the autopha…
Yang 2023	Bibliometric analysis of acupuncture and moxibustion treatment for mild cognitive impairment	2023	Bibliometric analysis	Not specified	The study identified "inflammation" as the research frontier for acupuncture in MCI, with popular acupoints and keywords including "acupuncture, electroacupuncture, dementia, memory, vascular dementia, hippocampus." The research indicates an increase in publications, suggesting the growing popularity of acupuncture for improving cognitive function​.
Wang 2023	Exploring the mechanisms of acupuncture for cognitive disorders based on the brain-gut axis theory	2023	Review	GV20 (Baihui), GV24 (Shenting)	Acupuncture, through the brain-gut axis, helps maintain gut microbial ecological balance, increases beneficial microbial populations, regulates metabolism, and promotes the production of BDNF. It also inhibits microglial activation and reduces neuroinflammation, suggesting the potential of acupuncture to enhance cognitive function via gut microbiota regulation​.
Xin 2024	Protective Role of Electroacupuncture Against Cognitive Impairment in Neurological Diseases	2024	Review	GV20 (Baihui), BL23 (Shenshu), GV24 (Shenting), ST36 (Zusanli), PC6 (Neiguan), SP6 (Sanyinjiao)	EA ameliorated cognitive impairment in preclinical models of neurological diseases, such as Alzheimer's disease, vascular cognitive impairment, chronic pain, and Parkinson's disease. The mechanisms include reducing neuroinflammation, neuronal apoptosis, promoting neurogenesis, synaptic plasticity, and autophagy​.

## Sheet: meta-analysis
article	title	years	Study type	The acupoints involved	Main results and findings
Huang et al. (2016)	A systematic review and meta-analysis of acupuncture for improving learning and memory ability in animals	2016	Systematic review and meta-analysis of animal studies	Various acupoints including GV20, ST36, GV14, BL23, CV17	Cognitive improvement: Acupuncture significantly reduced escape latency, increased frequency of platform crossings, and time spent in the target quadrant. Meta-analysis results showed consistent effects across multiple animal studies. Evaluation indicators: Escape latency, platform crossing frequency, target quadrant time in Morris water maze.
Min 2016	An Updated Meta-Analysis of the Efficacy and Safety of Acupuncture Treatment for Vascular Cognitive Impairment Without Dementia	2016	Meta-analysis of RCTs	SiShenCong, ShenTing, BenShen, Baihui, RenZhong, ShenMen, TanZhong, QiHai, XueHai, ZuSanli, WaiGuan, YinTang, FengChi, ZhongWan, XinYu, PiYu, SiBai, TianZhu, NeiGuan, SanYingJiao, TaiChong, FengHe	The meta-analysis included 15 RCTs with 1148 participants. Acupuncture, compared to conventional or pharmacological treatment (e.g., nimodipine, oxiracetam), significantly improved cognitive assessment scores, including MMSE (MD = 1.46, 95% CI: 0.75–2.16, P < 0.01), MoCA (MD = 1.46, 95% CI: 0.76–2.16, P < 0.01), peak latency of P300 (MD = -24.56, 95% CI: -24.56 to -17.07, P < 0.01), and WMS (MD =…
Zhang 2018	Effects of acupuncture on vascular dementia (VD) animal models: a systematic review and meta-analysis	2018	Systematic review and meta-analysis	CV6, CV12, CV17, SP10, ST36 (Zusanli), GV14 (Dazhui), GV20 (Baihui)	Acupuncture improved cognitive function in VD models, with significant effects in Morris Water Maze tests. Mechanisms involved anti-apoptosis, anti-oxidative stress, and enhanced glucose and oxygen metabolism. Heterogeneity among studies was noted, but results suggested potential efficacy of acupuncture.
Li 2022	Efficacy of acupuncture in animal models of vascular dementia: A systematic review and network meta-analysis	2022	Systematic review and meta-analysis	GV20 (Baihui), ST36 (Zusanli)	Acupuncture, specifically GV20 + ST36 with 14-day manual acupuncture, significantly improved cognitive function in animal models of vascular dementia. Outcomes such as reduced escape latency, increased platform crossings, and improved target quadrant time were observed, indicating reduced oxidative stress, neuroinflammation, and increased synaptic plasticity​.
Su 2021	Effectiveness and Safety of Acupuncture for Vascular Cognitive Impairment: A Systematic Review and Meta-Analysis	2021	Systematic review and meta-analysis	LU11 (ShaoShang), LI11 (Quchi), HT7 (ShenMen), HT5 (TongLi), PC6 (NeiGuan), PC5 (JianShi), SJ5 (WaiGuan), LI1 (ShangYang), LI4 (Hegu), HT9 (ShaoChong), SJ1 (GuanChong), SI1 (ShaoZe), PC7 (DaLing), SP6 (ShanYinJiao), KID3 (TaiXi), KID4 (DaZhong), KID6 (ZhaoHai), ST36 (ZuSanLi), GB44 (ZuQiaoYin), UB67 (ZhiYin), GB30 (HuanTiao), DU1 (ChangQiang), SP10 (XueHai), UB23 (ShenShu), DU3 (YaoYangGuan), REN…	Acupuncture improved cognitive function and activities of daily living in patients with vascular cognitive impairment (VCI), with mean differences of 1.86 and -3.08, respectively, compared to Western medicine (WM). The combination of acupuncture with WM or usual care showed additional benefits. Manual and electroacupuncture did not show significant differences in effectiveness. The certainty of e…
Chen 2022	Effectiveness of acupuncture for patients with vascular dementia: A systematic review and meta-analysis	2022	Systematic review and meta-analysis	Not specified	Acupuncture improved cognitive function in vascular dementia patients, with significant effects on Hasegawa Dementia Scale (HDS) and MMSE scores. No significant association was found with ADL levels, suggesting that acupuncture's impact on daily functional improvement is limited. Further high-quality RCTs are needed to establish efficacy​.
Li 2023	Efficacy of acupuncture and pharmacological therapies for vascular cognitive impairment with no dementia: a network meta-analysis	2023	Systematic review	Not specified	Acupuncture combined with herbal decoction was the most effective intervention for VCIND, followed by EA. Combination therapies generally outperformed monotherapies, with significant improvements in MoCA and MMSE scores. The study highlighted acupuncture's superiority over pharmacological treatments alone​(li2023_2).
Huang 2023	Meta-analysis of the efficacy of acupuncture in the treatment of the vascular cognitive impairment associated with cerebral small vessel disease	2023	Meta-analysis	Not specified	Acupuncture significantly improved MoCA, MMSE, ADL scores, and reduced auditory P300 latency in patients with CSVD-VCI. However, due to limited sample sizes and study quality, more high-quality RCTs are needed to validate these findings​(huang2023).
Hou 2023	Does acupuncture have advantages in the rehabilitation of vascular mild cognitive impairment? A systematic review and meta-analysis	2023	Systematic review	Not specified	Acupuncture and electroacupuncture showed significant improvements in MoCA, MMSE, Barthel Index, and ADL scores in VMCI patients compared to control groups. Combination therapies were more effective than monotherapies, but variations in treatment duration highlighted the need for more rigorously designed trials.
Wen 2023	Can acupuncture reverse oxidative stress and neuroinflammatory damage in animal models of vascular dementia?	2023	Systematic review and meta-analysis	Not specified	Acupuncture significantly reduced oxidative stress markers (ROS, MDA) and neuroinflammatory factors (TNF-α, IL-1β, IL-6) while increasing SOD and Nissl-positive neurons in animal models of vascular dementia. The results suggest that acupuncture effectively targets oxidative stress and neuroinflammatory damage, proving it is not a placebo effect​.
Shen 2024	Meta-analysis with trial sequential analysis investigating the impact of adjunctive electroacupuncture therapy on vascular mild cognitive impairment	2024	Systematic review and meta-analysis	Not specified	EA as an adjunct to conventional therapy significantly improved MoCA, MMSE, and activities of daily living scores in VaMCI patients. The trial sequential analysis confirmed the stability of the conclusions, supporting the clinical efficacy of EA in treating VaMCI​.
Wen 2022	A network meta-analysis on the improvement of cognition in patients with vascular dementia by different acupuncture therapies	2022	Systematic review and meta-analysis	Body acupuncture (BA), electroacupuncture (EA), scalp acupuncture (SA)	Combined acupuncture therapies, such as MB + BA and EA + SA + BA, showed better efficacy in improving cognition and activities of daily living compared to single acupuncture techniques, suggesting that combined approaches may enhance therapeutic outcomes for VaD.
Tang 2022	Acupuncture on vascular cognitive impairment associated with cerebral small vessel disease: A systematic review and meta-analysis	2022	Systematic review and meta-analysis	Not specified	Acupuncture, including conventional and electro-acupuncture, improved MoCA and MMSE scores for patients with VCI associated with CSVD. Despite a high risk of bias, results suggest acupuncture could be beneficial for improving cognitive functions in these patients​.

## Sheet: Other literature research
article	title	years	Study type	The acupoints involved	Main results and findings
Sun 2019	Can Acupuncture Treatment of Hypertension Improve Brain Health? A Mini Review	2019	Mini Review	GV20, ST36, GB20, LV3, LV4, SJ5, GB34, PC6, HT7, LI4, LI11	Acupuncture was found to reduce blood pressure (BP) and improve cerebrovascular reactivity, potentially benefiting brain health by enhancing cerebral blood flow (CBF). Specific acupoints like GV20, ST36, and GB20 were associated with improved CBF in the posterior arteries. Acupuncture was also linked to reduced oxidative stress and modulation of the autonomic nervous system, which may contribute …

## Sheet: Delphi 
article	title	years	Study type	The acupoints involved	Main results and findings
Su 2020	Acupuncture therapy for cognitive impairment: A Delphi expert consensus survey	2020	Delphi consensus survey	Not specifically mentioned	Acupuncture was agreed to improve cognitive impairment effectively. The expert panel recommended several aspects, including therapeutic effects, principles, acupoint selection, and combination. No acupoints were specifically identified, but the survey provided consensus on clinical parameters for cognitive impairment treatment.
